# Supplementary material
Source: publisher figshare collection journal article supplement (https://frontiersin.figshare.com/ndownloader/files/22534340)

**A**

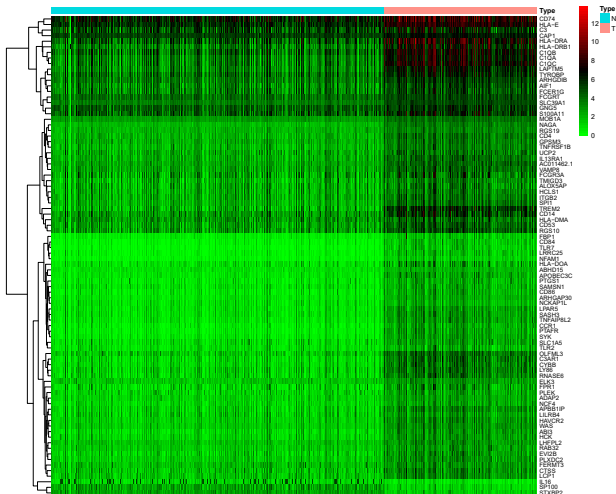

B

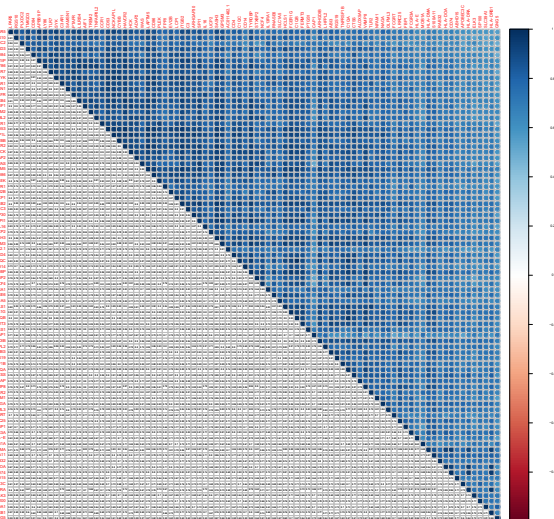

Supplement: Supplementary file [file 22534340]
